# Supplementary material for: Transcriptomic analysis of the cerebral hippocampal tissue in spontaneously hypertensive rats exposed to acute hypobaric hypoxia: associations with inflammation and energy metabolism
Source: PubMed Central journal article supplement (PMC9988845; doi:10.1038/s41598-023-30682-0), 2023-03-06
Supplement: 41598_2023_30682_MOESM1_ESM.pdf [file 41598_2023_30682_MOESM1_ESM.pdf]

**Table S1. The blood pressure of spontaneously hypertensive rats.**

| Sample Name   | SBP(mmHg) |     |     |     |     | DBP(mmHg) |     |     |     |     |
|---------------|-----------|-----|-----|-----|-----|-----------|-----|-----|-----|-----|
| Control-24h-1 | 153       | 148 | 151 | 158 | 153 | 124       | 115 | 116 | 109 | 106 |
| Control-24h-2 | 159       | 143 | 150 | 155 | 145 | 110       | 108 | 112 | 113 | 105 |
| Control-24h-3 | 144       | 142 | 140 | 147 | 146 | 108       | 106 | 111 | 105 | 103 |
| Control-24h-4 | 160       | 155 | 149 | 152 | 159 | 113       | 119 | 128 | 112 | 115 |
| Control-24h-5 | 156       | 156 | 157 | 159 | 160 | 103       | 110 | 112 | 110 | 108 |
| Control-24h-6 | 150       | 151 | 155 | 154 | 153 | 111       | 115 | 116 | 114 | 110 |
| Control-24h-7 | 151       | 156 | 145 | 148 | 148 | 100       | 101 | 99  | 104 | 102 |
| Control-24h-8 | 145       | 150 | 148 | 148 | 146 | 101       | 103 | 101 | 103 | 104 |
| Control-24h-9 | 148       | 149 | 150 | 154 | 151 | 102       | 109 | 103 | 101 | 105 |
| AHH-24h-1     | 156       | 152 | 150 | 149 | 151 | 127       | 119 | 114 | 110 | 108 |
| AHH-24h-2     | 146       | 149 | 150 | 151 | 147 | 108       | 110 | 108 | 104 | 106 |
| AHH-24h-3     | 150       | 151 | 144 | 152 | 149 | 119       | 114 | 107 | 113 | 114 |
| AHH-24h-4     | 155       | 152 | 151 | 145 | 151 | 111       | 109 | 115 | 110 | 113 |
| AHH-24h-5     | 149       | 148 | 150 | 148 | 151 | 101       | 108 | 102 | 103 | 105 |
| AHH-24h-6     | 161       | 159 | 158 | 155 | 158 | 159       | 116 | 118 | 117 | 114 |
| AHH-24h-7     | 154       | 155 | 154 | 153 | 151 | 110       | 108 | 109 | 106 | 104 |
| AHH-24h-8     | 153       | 148 | 151 | 153 | 153 | 107       | 109 | 104 | 103 | 106 |
| AHH-24h-9     | 159       | 155 | 153 | 154 | 151 | 109       | 103 | 105 | 106 | 104 |

SBP: systolic blood pressure. DBP: diastolic blood pressure.
