# Supplementary material for: Transcriptomic analysis of the cerebral hippocampal tissue in spontaneously hypertensive rats exposed to acute hypobaric hypoxia: associations with inflammation and energy metabolism
Source: PubMed Central journal article supplement (PMC9988845; doi:10.1038/s41598-023-30682-0), 2023-03-06
Supplement: 41598_2023_30682_MOESM2_ESM.pdf [file 41598_2023_30682_MOESM2_ESM.pdf]

**Table S10. Summary of Kyoto Encyclopedia of Genes and Genomes (KEGG) top 10 pathways analysis of differential expression genes (DEGs).**

| <b>Pathway ID</b> | <b>Description</b>                                   | <b>Number of DEGs in category</b> |
|-------------------|------------------------------------------------------|-----------------------------------|
| rno04926          | Relaxin signaling pathway                            | 7                                 |
| rno04151          | PI3K-Akt signaling pathway                           | 9                                 |
| rno04014          | Ras signaling pathway                                | 6                                 |
| rno04064          | NF-kappa B signaling pathway                         | 4                                 |
| rno04933          | AGE-RAGE signaling pathway in diabetic complications | 4                                 |
| rno04010          | MAPK signaling pathway                               | 6                                 |
| rno04150          | mTOR signaling pathway                               | 4                                 |
| rno04310          | Wnt signaling pathway                                | 4                                 |
| rno04066          | HIF-1 signaling pathway                              | 3                                 |
| rno04722          | Neurotrophin signaling pathway                       | 3                                 |
