# Supplementary material for: Transcriptomic analysis of the cerebral hippocampal tissue in spontaneously hypertensive rats exposed to acute hypobaric hypoxia: associations with inflammation and energy metabolism
Source: PubMed Central journal article supplement (PMC9988845; doi:10.1038/s41598-023-30682-0), 2023-03-06
Supplement: 41598_2023_30682_MOESM3_ESM.pdf [file 41598_2023_30682_MOESM3_ESM.pdf]

**Table S11. Reverse transcription qPCR data for 9 differential expression genes.**

*Vegfa*

| Simple      | Control-<br>24h-4 | Control-<br>24h-5 | Control-<br>24h-6 | Control-<br>24h-7 | Control-<br>24h-8 | Control-<br>24h-9 | AHH-<br>24h-4 | AHH-<br>24h-5 | AHH-<br>24h-6 | AHH-<br>24h-7 | AHH-<br>24h-8 | AHH-<br>24h-9 |
|-------------|-------------------|-------------------|-------------------|-------------------|-------------------|-------------------|---------------|---------------|---------------|---------------|---------------|---------------|
| $\Delta$ CT | 6.35272           | 7.45879           | 6.87563           | 6.06004           | 7.63816           | 6.93792           | 5.066         | 5.748         | 5.745         | 5.304         | 5.556         | 5.555         |
| F           | 1.44843           | 0.67288           | 1.00806           | 1.7742            | 0.59421           | 0.96546           | 3.534         | 2.202         | 2.207         | 2.997         | 2.517         | 2.519         |
| Mean        | 1.077207692       |                   |                   |                   |                   |                   | 2.662441222   |               |               |               |               |               |
| SD          | 0.415861998       |                   |                   |                   |                   |                   | 0.471237078   |               |               |               |               |               |

*Acta2*

| Simple      | Control-<br>24h-4 | Control-<br>24h-5 | Control-<br>24h-6 | Control-<br>24h-7 | Control-<br>24h-8 | Control-<br>24h-9 | AHH-<br>24h-4 | AHH-<br>24h-5 | AHH-<br>24h-6 | AHH-<br>24h-7 | AHH-<br>24h-8 | AHH-<br>24h-9 |
|-------------|-------------------|-------------------|-------------------|-------------------|-------------------|-------------------|---------------|---------------|---------------|---------------|---------------|---------------|
| $\Delta$ CT | 4.0292            | 4.36637           | 4.12545           | 4.09059           | 4.00846           | 4.29452           | 5.049         | 4.952         | 5.235         | 4.983         | 5.372         | 5.26          |
| F           | 1.08917           | 0.86218           | 1.01888           | 1.0438            | 1.10494           | 0.90621           | 0.537         | 0.575         | 0.472         | 0.562         | 0.43          | 0.464         |
| Mean        | 1.004196202       |                   |                   |                   |                   |                   | 0.506592542   |               |               |               |               |               |
| SD          | 0.090300582       |                   |                   |                   |                   |                   | 0.054127346   |               |               |               |               |               |

*Nfkbia*

| Simple      | Control-<br>24h-4 | Control-<br>24h-5 | Control-<br>24h-6 | Control-<br>24h-7 | Control-<br>24h-8 | Control-<br>24h-9 | AHH-<br>24h-4 | AHH-<br>24h-5 | AHH-<br>24h-6 | AHH-<br>24h-7 | AHH-<br>24h-8 | AHH-<br>24h-9 |
|-------------|-------------------|-------------------|-------------------|-------------------|-------------------|-------------------|---------------|---------------|---------------|---------------|---------------|---------------|
| $\Delta$ CT | 3.77481           | 3.71469           | 4.1205            | 3.50285           | 3.35678           | 3.6229            | 4.112         | 4.65          | 4.325         | 4.046         | 4.07          | 4.35          |
| F           | 0.93775           | 0.97766           | 0.73795           | 1.13228           | 1.25293           | 1.04188           | 0.743         | 0.511         | 0.64          | 0.777         | 0.764         | 0.63          |
| Mean        | 1.013408664       |                   |                   |                   |                   |                   | 0.677510765   |               |               |               |               |               |
| SD          | 0.160828992       |                   |                   |                   |                   |                   | 0.094007537   |               |               |               |               |               |

*Col1A1*

| Simple      | Control-<br>24h-4 | Control-<br>24h-5 | Control-<br>24h-6 | Control-<br>24h-7 | Control-<br>24h-8 | Control-<br>24h-9 | AHH-<br>24h-4 | AHH-<br>24h-5 | AHH-<br>24h-6 | AHH-<br>24h-7 | AHH-<br>24h-8 | AHH-<br>24h-9 |
|-------------|-------------------|-------------------|-------------------|-------------------|-------------------|-------------------|---------------|---------------|---------------|---------------|---------------|---------------|
| $\Delta$ CT | 5.78789           | 5.77386           | 5.83255           | 6.51594           | 6.41595           | 6.66828           | 7.641         | 7.412         | 8.223         | 7.575         | 7.832         | 8.248         |
| F           | 1.29941           | 1.31211           | 1.2598            | 0.78448           | 0.84078           | 0.70586           | 0.36          | 0.421         | 0.24          | 0.377         | 0.315         | 0.236         |
| Mean        | 1.033739313       |                   |                   |                   |                   |                   | 0.324866558   |               |               |               |               |               |
| SD          | 0.260140655       |                   |                   |                   |                   |                   | 0.068727245   |               |               |               |               |               |

*Edn1*

| Simple      | Control-<br>24h-4 | Control-<br>24h-5 | Control-<br>24h-6 | Control-<br>24h-7 | Control-<br>24h-8 | Control-<br>24h-9 | AHH-<br>24h-4 | AHH-<br>24h-5 | AHH-<br>24h-6 | AHH-<br>24h-7 | AHH-<br>24h-8 | AHH-<br>24h-9 |
|-------------|-------------------|-------------------|-------------------|-------------------|-------------------|-------------------|---------------|---------------|---------------|---------------|---------------|---------------|
| $\Delta$ CT | 7.28287           | 7.33799           | 7.11432           | 7.46261           | 7.45657           | 7.81616           | 8             | 8.102         | 8.822         | 8.307         | 8.168         | 8.192         |
| F           | 1.09344           | 1.05246           | 1.22896           | 0.96536           | 0.96941           | 0.75555           | 0.665         | 0.62          | 0.376         | 0.538         | 0.592         | 0.582         |
| Mean        | 1.01086414        |                   |                   |                   |                   |                   | 0.562217983   |               |               |               |               |               |
| SD          | 0.144389619       |                   |                   |                   |                   |                   | 0.091652558   |               |               |               |               |               |

*Angpt2*

| Simple      | Control-<br>24h-4 | Control-<br>24h-5 | Control-<br>24h-6 | Control-<br>24h-7 | Control-<br>24h-8 | Control-<br>24h-9 | AHH-<br>24h-4 | AHH-<br>24h-5 | AHH-<br>24h-6 | AHH-<br>24h-7 | AHH-<br>24h-8 | AHH-<br>24h-9 |
|-------------|-------------------|-------------------|-------------------|-------------------|-------------------|-------------------|---------------|---------------|---------------|---------------|---------------|---------------|
| $\Delta$ CT | 8.37199           | 9.13723           | 9.4352            | 8.66467           | 8.95786           | 9.37291           | 7.078         | 7.258         | 7.427         | 6.84          | 7.45          | 7.618         |
| F           | 1.53473           | 0.90297           | 0.73447           | 1.25293           | 1.02251           | 0.76688           | 3.763         | 3.323         | 2.954         | 4.437         | 2.907         | 2.589         |
| Mean        | 1.035747912       |                   |                   |                   |                   |                   | 3.328774783   |               |               |               |               |               |
| SD          | 0.281962069       |                   |                   |                   |                   |                   | 0.616700484   |               |               |               |               |               |

*Itgal*

| Simple | Control-<br>24h-4 | Control-<br>24h-5 | Control-<br>24h-6 | Control-<br>24h-7 | Control-<br>24h-8 | Control-<br>24h-9 | AHH-<br>24h-4 | AHH-<br>24h-5 | AHH-<br>24h-6 | AHH-<br>24h-7 | AHH-<br>24h-8 | AHH-<br>24h-9 |
|--------|-------------------|-------------------|-------------------|-------------------|-------------------|-------------------|---------------|---------------|---------------|---------------|---------------|---------------|
|--------|-------------------|-------------------|-------------------|-------------------|-------------------|-------------------|---------------|---------------|---------------|---------------|---------------|---------------|

|             |             |         |         |         |         |         |             |       |       |       |       |       |
|-------------|-------------|---------|---------|---------|---------|---------|-------------|-------|-------|-------|-------|-------|
| <b>ΔCT</b>  | 5.50999     | 5.31168 | 4.92643 | 5.07293 | 4.98417 | 4.36192 | 5.385       | 6.002 | 6.865 | 6.621 | 5.431 | 6.046 |
| <b>F</b>    | 0.71592     | 0.82141 | 1.07283 | 0.96924 | 1.03074 | 1.5866  | 0.781       | 0.509 | 0.28  | 0.332 | 0.756 | 0.494 |
| <b>Mean</b> | 1.032789003 |         |         |         |         |         | 0.525185989 |       |       |       |       |       |
| <b>SD</b>   | 0.276116493 |         |         |         |         |         | 0.190448448 |       |       |       |       |       |

*Ngfr*

| Simple      | Control-<br>24h-4 | Control-<br>24h-5 | Control-<br>24h-6 | Control-<br>24h-7 | Control-<br>24h-8 | Control-<br>24h-9 | AHH-<br>24h-4 | AHH-<br>24h-5 | AHH-<br>24h-6 | AHH-<br>24h-7 | AHH-<br>24h-8 | AHH-<br>24h-9 |
|-------------|-------------------|-------------------|-------------------|-------------------|-------------------|-------------------|---------------|---------------|---------------|---------------|---------------|---------------|
| <b>ΔCT</b>  | 10.3978           | 10.8095           | 10.919            | 10.6274           | 10.1487           | 10.3544           | 11.05         | 11.31         | 12.58         | 12.29         | 11.07         | 11.76         |
| <b>F</b>    | 1.10574           | 0.8312            | 0.77049           | 0.94305           | 1.31413           | 1.13947           | 0.702         | 0.587         | 0.244         | 0.298         | 0.692         | 0.43          |
| <b>Mean</b> | 1.01734611        |                   |                   |                   |                   |                   | 0.492148205   |               |               |               |               |               |
| <b>SD</b>   | 0.187934565       |                   |                   |                   |                   |                   | 0.180826636   |               |               |               |               |               |

*Sgk1*

| Simple      | Control-<br>24h-4 | Control-<br>24h-5 | Control-<br>24h-6 | Control-<br>24h-7 | Control-<br>24h-8 | Control-<br>24h-9 | AHH-<br>24h-4 | AHH-<br>24h-5 | AHH-<br>24h-6 | AHH-<br>24h-7 | AHH-<br>24h-8 | AHH-<br>24h-9 |
|-------------|-------------------|-------------------|-------------------|-------------------|-------------------|-------------------|---------------|---------------|---------------|---------------|---------------|---------------|
| <b>ΔCT</b>  | 3.84672           | 3.81659           | 3.8232            | 3.29841           | 3.29308           | 3.68931           | 5.35          | 5.229         | 5.209         | 4.389         | 4.209         | 4.888         |
| <b>F</b>    | 0.85926           | 0.87739           | 0.87338           | 1.25656           | 1.26121           | 0.95832           | 0.303         | 0.33          | 0.334         | 0.59          | 0.669         | 0.418         |
| <b>Mean</b> | 1.014352459       |                   |                   |                   |                   |                   | 0.440479918   |               |               |               |               |               |
| <b>SD</b>   | 0.175796019       |                   |                   |                   |                   |                   | 0.13990341    |               |               |               |               |               |

Sample name: sample name of the animal from different groups.  $\Delta CT = CT(\text{target, test}) - CT(\text{ref, test})$ .  $F = 2^{-\Delta \Delta CT} = 2^{-\Delta CT(\text{Simple1}) - \Delta CT(\text{Calibrator1})}$ . Mean: mean of F value from the same group. SD: standard deviation of F value from the same group.
