# Supplementary material for: Transcriptomic analysis of the cerebral hippocampal tissue in spontaneously hypertensive rats exposed to acute hypobaric hypoxia: associations with inflammation and energy metabolism
Source: PubMed Central journal article supplement (PMC9988845; doi:10.1038/s41598-023-30682-0), 2023-03-06
Supplement: 41598_2023_30682_MOESM4_ESM.pdf [file 41598_2023_30682_MOESM4_ESM.pdf]

**Table S2. Primer sequences for RT-qPCR.**

| <b>Gene</b>                     |         | <b>Primer sequence</b>    | <b>prodSize</b> |
|---------------------------------|---------|---------------------------|-----------------|
| <i>vegfa</i>                    | FORWARD | CACCAAAGCCAGCACATAGGAGAG  | 144bp           |
|                                 | REVERSE | CTGCGGATCTTGGACAAACAAATGC |                 |
| <i>Acta2</i>                    | FORWARD | GCGTGGCTATTCCTTCGTGACTAC  | 149bp           |
|                                 | REVERSE | CATCAGGCAGTTCGTAGCTCTTCTC |                 |
| <i>Nfkbia</i>                   | FORWARD | ACTTGGTGACTTTGGGTGCTGATG  | 118bp           |
|                                 | REVERSE | CCACACTTCAACAGGAGCGAGAC   |                 |
| <i>Coll1a1</i>                  | FORWARD | TGTTGGTCCTGCTGGCAAGAATG   | 145bp           |
|                                 | REVERSE | GTCACCTTGTTGCGCTGTCTCAC   |                 |
| <i>Edn1</i>                     | FORWARD | CTTCTGCCACCTGGACATCATCTG  | 132bp           |
|                                 | REVERSE | CTGTTCCCTTGGTCTGTGGTCTTTG |                 |
| <i>Angpt2</i>                   | FORWARD | CAGTAGCATCAGCCAACCAGGAAG  | 114bp           |
|                                 | REVERSE | CCACATGCGTCGAACCACCAG     |                 |
| <i>Itgal</i>                    | FORWARD | CAAGTGAATGTCTCGCTCCTCCTG  | 136bp           |
|                                 | REVERSE | CTCGCTTCCGGTTGCTGCTAC     |                 |
| <i>Ngfr</i>                     | FORWARD | GCTGCTGCTGATTCTAGGGATGTC  | 150bp           |
|                                 | REVERSE | GGTTCACACACGGTCTGGTTGG    |                 |
| <i>Sgk1</i>                     | FORWARD | GCCAAACCCTCTGACTTCCACTTC  | 90bp            |
|                                 | REVERSE | TGCTTCTTCTGCCTTGTGCCTTG   |                 |
| <i><math>\beta</math>-Actin</i> | FORWARD | GAAGTGTGACGTTGACATCCG     | 282bp           |
|                                 | REVERSE | GCCTAGAAGCATTGCGGTG       |                 |

Primer sequences were retrieved from PrimerBank 40, and primer specificity was further validated using the National Center for Biotechnology Information Primer-BLAST tool.
