# Supplementary material for: Transcriptomic analysis of the cerebral hippocampal tissue in spontaneously hypertensive rats exposed to acute hypobaric hypoxia: associations with inflammation and energy metabolism
Source: PubMed Central journal article supplement (PMC9988845; doi:10.1038/s41598-023-30682-0), 2023-03-06
Supplement: 41598_2023_30682_MOESM5_ESM.pdf [file 41598_2023_30682_MOESM5_ESM.pdf]

**Table S3. Summary of Gene Ontology (GO) analysis of 112 differential expression genes (DEGs).**

| <b>Term Type</b>   | <b>GO ID</b> | <b>Term description</b>                                            | <b>Count</b> |
|--------------------|--------------|--------------------------------------------------------------------|--------------|
| Biological_process | GO:0001503   | ossification                                                       | 13           |
| Biological_process | GO:0001569   | branching involved in blood vessel morphogenesis                   | 5            |
| Biological_process | GO:0031214   | biomineral tissue development                                      | 8            |
| Biological_process | GO:0110148   | biomineralization                                                  | 8            |
| Biological_process | GO:0007411   | axon guidance                                                      | 9            |
| Biological_process | GO:0097485   | neuron projection guidance                                         | 9            |
| Biological_process | GO:0031960   | response to corticosteroid                                         | 10           |
| Biological_process | GO:0009612   | response to mechanical stimulus                                    | 10           |
| Biological_process | GO:0030199   | collagen fibril organization                                       | 5            |
| Biological_process | GO:0060343   | trabecula formation                                                | 4            |
| Biological_process | GO:0007271   | synaptic transmission, cholinergic                                 | 4            |
| Biological_process | GO:0051384   | response to glucocorticoid                                         | 9            |
| Biological_process | GO:0009266   | response to temperature stimulus                                   | 8            |
| Biological_process | GO:0048841   | regulation of axon extension involved in axon guidance             | 4            |
| Biological_process | GO:0071385   | cellular response to glucocorticoid stimulus                       | 6            |
| Biological_process | GO:0003018   | vascular process in circulatory system                             | 8            |
| Biological_process | GO:0060346   | bone trabecula formation                                           | 3            |
| Biological_process | GO:0071356   | cellular response to tumor necrosis factor                         | 8            |
| Biological_process | GO:0030282   | bone mineralization                                                | 6            |
| Biological_process | GO:0048846   | axon extension involved in axon guidance                           | 4            |
| Biological_process | GO:1902284   | neuron projection extension involved in neuron projection guidance | 4            |
| Biological_process | GO:0071384   | cellular response to corticosteroid stimulus                       | 6            |
| Biological_process | GO:0071559   | response to transforming growth factor beta                        | 8            |
| Biological_process | GO:0034612   | response to tumor necrosis factor                                  | 8            |
| Biological_process | GO:0061430   | bone trabecula morphogenesis                                       | 3            |

|                    |            |                                                                                      |    |
|--------------------|------------|--------------------------------------------------------------------------------------|----|
| Biological_process | GO:0070431 | nucleotide-binding oligomerization domain containing 2 signaling pathway             | 3  |
| Biological_process | GO:0001961 | positive regulation of cytokine-mediated signaling pathway                           | 4  |
| Biological_process | GO:0060485 | mesenchyme development                                                               | 8  |
| Biological_process | GO:0070423 | nucleotide-binding oligomerization domain containing signaling pathway               | 3  |
| Biological_process | GO:0035872 | nucleotide-binding domain, leucine rich repeat containing receptor signaling pathway | 3  |
| Biological_process | GO:0007409 | axonogenesis                                                                         | 10 |
| Biological_process | GO:0048762 | mesenchymal cell differentiation                                                     | 7  |
| Biological_process | GO:0097191 | extrinsic apoptotic signaling pathway                                                | 7  |
| Biological_process | GO:0060760 | positive regulation of response to cytokine stimulus                                 | 4  |
| Biological_process | GO:0061383 | trabecula morphogenesis                                                              | 4  |
| Biological_process | GO:0072593 | reactive oxygen species metabolic process                                            | 7  |
| Biological_process | GO:0001755 | neural crest cell migration                                                          | 4  |
| Biological_process | GO:0007588 | excretion                                                                            | 4  |
| Biological_process | GO:0044070 | regulation of anion transport                                                        | 5  |
| Biological_process | GO:0001558 | regulation of cell growth                                                            | 9  |
| Biological_process | GO:0048754 | branching morphogenesis of an epithelial tube                                        | 6  |
| Biological_process | GO:0071560 | cellular response to transforming growth factor beta stimulus                        | 7  |
| Biological_process | GO:0006939 | smooth muscle contraction                                                            | 5  |
| Biological_process | GO:0050926 | regulation of positive chemotaxis                                                    | 3  |
| Biological_process | GO:0001667 | ameboidal-type cell migration                                                        | 9  |
| Biological_process | GO:0015837 | amine transport                                                                      | 5  |
| Biological_process | GO:0014829 | vascular associated smooth muscle contraction                                        | 3  |
| Biological_process | GO:0035809 | regulation of urine volume                                                           | 3  |
| Biological_process | GO:0006940 | regulation of smooth muscle contraction                                              | 4  |
| Biological_process | GO:0003014 | renal system process                                                                 | 5  |

|                    |            |                                                                                   |   |
|--------------------|------------|-----------------------------------------------------------------------------------|---|
| Biological_process | GO:0060384 | innervation                                                                       | 3 |
| Biological_process | GO:0030278 | regulation of ossification                                                        | 5 |
| Biological_process | GO:0015711 | organic anion transport                                                           | 8 |
| Biological_process | GO:0035094 | response to nicotine                                                              | 4 |
| Biological_process | GO:0045123 | cellular extravasation                                                            | 4 |
| Biological_process | GO:0038034 | signal transduction in absence of ligand                                          | 4 |
| Biological_process | GO:0097192 | extrinsic apoptotic signaling pathway in absence of ligand                        | 4 |
| Biological_process | GO:0045987 | positive regulation of smooth muscle contraction                                  | 3 |
| Biological_process | GO:0060070 | canonical Wnt signaling pathway                                                   | 7 |
| Biological_process | GO:0060562 | epithelial tube morphogenesis                                                     | 8 |
| Biological_process | GO:0008217 | regulation of blood pressure                                                      | 6 |
| Biological_process | GO:0030218 | erythrocyte differentiation                                                       | 5 |
| Biological_process | GO:1901099 | negative regulation of signal transduction in absence of ligand                   | 3 |
| Biological_process | GO:2001240 | negative regulation of extrinsic apoptotic signaling pathway in absence of ligand | 3 |
| Biological_process | GO:0061448 | connective tissue development                                                     | 7 |
| Biological_process | GO:0051216 | cartilage development                                                             | 6 |
| Biological_process | GO:0046942 | carboxylic acid transport                                                         | 7 |
| Biological_process | GO:0033209 | tumor necrosis factor-mediated signaling pathway                                  | 4 |
| Biological_process | GO:0071542 | dopaminergic neuron differentiation                                               | 3 |
| Biological_process | GO:0001649 | osteoblast differentiation                                                        | 6 |
| Biological_process | GO:0048675 | axon extension                                                                    | 5 |
| Biological_process | GO:2001233 | regulation of apoptotic signaling pathway                                         | 8 |
| Biological_process | GO:0061138 | morphogenesis of a branching epithelium                                           | 6 |
| Biological_process | GO:0001837 | epithelial to mesenchymal transition                                              | 5 |
| Biological_process | GO:0008361 | regulation of cell size                                                           | 6 |
| Biological_process | GO:0019221 | cytokine-mediated signaling pathway                                               | 8 |
| Biological_process | GO:0014032 | neural crest cell development                                                     | 4 |

|                    |            |                                                                                                              |   |
|--------------------|------------|--------------------------------------------------------------------------------------------------------------|---|
| Biological_process | GO:0042476 | odontogenesis                                                                                                | 5 |
| Biological_process | GO:0034101 | erythrocyte homeostasis                                                                                      | 5 |
| Biological_process | GO:0035811 | negative regulation of urine volume                                                                          | 2 |
| Biological_process | GO:0098700 | neurotransmitter loading into synaptic vesicle                                                               | 2 |
| Biological_process | GO:1901029 | negative regulation of mitochondrial outer membrane permeabilization involved in apoptotic signaling pathway | 2 |
| Biological_process | GO:0002687 | positive regulation of leukocyte migration                                                                   | 5 |
| Biological_process | GO:0015695 | organic cation transport                                                                                     | 3 |
| Biological_process | GO:0055067 | monovalent inorganic cation homeostasis                                                                      | 5 |
| Biological_process | GO:0050920 | regulation of chemotaxis                                                                                     | 6 |
| Biological_process | GO:0010717 | regulation of epithelial to mesenchymal transition                                                           | 4 |
| Biological_process | GO:0014031 | mesenchymal cell development                                                                                 | 4 |
| Biological_process | GO:0048864 | stem cell development                                                                                        | 4 |
| Biological_process | GO:0048863 | stem cell differentiation                                                                                    | 6 |
| Biological_process | GO:0002691 | regulation of cellular extravasation                                                                         | 3 |
| Biological_process | GO:0030099 | myeloid cell differentiation                                                                                 | 8 |
| Biological_process | GO:0016055 | Wnt signaling pathway                                                                                        | 8 |
| Biological_process | GO:0010968 | regulation of microtubule nucleation                                                                         | 2 |
| Biological_process | GO:0060174 | limb bud formation                                                                                           | 2 |
| Biological_process | GO:0070424 | regulation of nucleotide-binding oligomerization domain containing signaling pathway                         | 2 |
| Biological_process | GO:0090084 | negative regulation of inclusion body assembly                                                               | 2 |
| Biological_process | GO:0021675 | nerve development                                                                                            | 4 |
| Biological_process | GO:0043270 | positive regulation of ion transport                                                                         | 7 |
| Biological_process | GO:0060323 | head morphogenesis                                                                                           | 3 |
| Biological_process | GO:0198738 | cell-cell signaling by wnt                                                                                   | 8 |
| Biological_process | GO:0001763 | morphogenesis of a branching structure                                                                       | 6 |
| Biological_process | GO:0014033 | neural crest cell differentiation                                                                            | 4 |

|                    |            |                                                                          |   |
|--------------------|------------|--------------------------------------------------------------------------|---|
| Biological_process | GO:0031110 | regulation of microtubule polymerization or depolymerization             | 4 |
| Biological_process | GO:0015849 | organic acid transport                                                   | 7 |
| Biological_process | GO:0072006 | nephron development                                                      | 5 |
| Biological_process | GO:0085029 | extracellular matrix assembly                                            | 3 |
| Biological_process | GO:2001236 | regulation of extrinsic apoptotic signaling pathway                      | 5 |
| Biological_process | GO:0042088 | T-helper 1 type immune response                                          | 3 |
| Biological_process | GO:0045117 | azole transmembrane transport                                            | 2 |
| Biological_process | GO:0070472 | regulation of uterine smooth muscle contraction                          | 2 |
| Biological_process | GO:1903265 | positive regulation of tumor necrosis factor-mediated signaling pathway  | 2 |
| Biological_process | GO:0070167 | regulation of biomineral tissue development                              | 4 |
| Biological_process | GO:2001237 | negative regulation of extrinsic apoptotic signaling pathway             | 4 |
| Biological_process | GO:0022407 | regulation of cell-cell adhesion                                         | 8 |
| Biological_process | GO:0110149 | regulation of biomineralization                                          | 4 |
| Biological_process | GO:0035107 | appendage morphogenesis                                                  | 5 |
| Biological_process | GO:0035108 | limb morphogenesis                                                       | 5 |
| Biological_process | GO:0048705 | skeletal system morphogenesis                                            | 6 |
| Biological_process | GO:0071383 | cellular response to steroid hormone stimulus                            | 6 |
| Biological_process | GO:0032905 | transforming growth factor beta1 production                              | 2 |
| Biological_process | GO:0043589 | skin morphogenesis                                                       | 2 |
| Biological_process | GO:0048251 | elastic fiber assembly                                                   | 2 |
| Biological_process | GO:0060179 | male mating behavior                                                     | 2 |
| Biological_process | GO:0070471 | uterine smooth muscle contraction                                        | 2 |
| Biological_process | GO:0010718 | positive regulation of epithelial to mesenchymal transition              | 3 |
| Biological_process | GO:2001239 | regulation of extrinsic apoptotic signaling pathway in absence of ligand | 3 |
| Biological_process | GO:0071548 | response to dexamethasone                                                | 4 |

|                    |            |                                                                                              |   |
|--------------------|------------|----------------------------------------------------------------------------------------------|---|
| Biological_process | GO:0002753 | cytoplasmic pattern recognition receptor signaling pathway                                   | 3 |
| Biological_process | GO:0045933 | positive regulation of muscle contraction                                                    | 3 |
| Biological_process | GO:0016525 | negative regulation of angiogenesis                                                          | 4 |
| Biological_process | GO:0043618 | regulation of transcription from RNA polymerase II promoter in response to stress            | 3 |
| Biological_process | GO:0045124 | regulation of bone resorption                                                                | 3 |
| Biological_process | GO:0007179 | transforming growth factor beta receptor signaling pathway                                   | 5 |
| Biological_process | GO:0035296 | regulation of tube diameter                                                                  | 5 |
| Biological_process | GO:0097746 | blood vessel diameter maintenance                                                            | 5 |
| Biological_process | GO:0036293 | response to decreased oxygen levels                                                          | 8 |
| Biological_process | GO:0035150 | regulation of tube size                                                                      | 5 |
| Biological_process | GO:0051954 | positive regulation of amine transport                                                       | 3 |
| Biological_process | GO:0002027 | regulation of heart rate                                                                     | 4 |
| Biological_process | GO:2000181 | negative regulation of blood vessel morphogenesis                                            | 4 |
| Biological_process | GO:0001822 | kidney development                                                                           | 7 |
| Biological_process | GO:1903522 | regulation of blood circulation                                                              | 6 |
| Biological_process | GO:1901343 | negative regulation of vasculature development                                               | 4 |
| Biological_process | GO:0010039 | response to iron ion                                                                         | 3 |
| Biological_process | GO:0035815 | positive regulation of renal sodium excretion                                                | 2 |
| Biological_process | GO:0060700 | regulation of ribonuclease activity                                                          | 2 |
| Biological_process | GO:0097201 | negative regulation of transcription from RNA polymerase II promoter in response to stress   | 2 |
| Biological_process | GO:1903587 | regulation of blood vessel endothelial cell proliferation involved in sprouting angiogenesis | 2 |
| Biological_process | GO:0060537 | muscle tissue development                                                                    | 8 |
| Biological_process | GO:0000302 | response to reactive oxygen species                                                          | 6 |
| Biological_process | GO:0060840 | artery development                                                                           | 4 |
| Biological_process | GO:0032892 | positive regulation of organic acid transport                                                | 3 |

|                    |            |                                                                 |   |
|--------------------|------------|-----------------------------------------------------------------|---|
| Biological_process | GO:0043620 | regulation of DNA-templated transcription in response to stress | 3 |
| Biological_process | GO:0042310 | vasoconstriction                                                | 4 |
| Biological_process | GO:0045666 | positive regulation of neuron differentiation                   | 4 |
| Biological_process | GO:0072132 | mesenchyme morphogenesis                                        | 3 |
| Biological_process | GO:0001764 | neuron migration                                                | 5 |
| Biological_process | GO:0030307 | positive regulation of cell growth                              | 5 |
| Biological_process | GO:0032308 | positive regulation of prostaglandin secretion                  | 2 |
| Biological_process | GO:0030516 | regulation of axon extension                                    | 4 |
| Biological_process | GO:0050900 | leukocyte migration                                             | 7 |
| Biological_process | GO:1904645 | response to amyloid-beta                                        | 3 |
| Biological_process | GO:0072001 | renal system development                                        | 7 |
| Biological_process | GO:0001101 | response to acid chemical                                       | 6 |
| Biological_process | GO:0002262 | myeloid cell homeostasis                                        | 5 |
| Biological_process | GO:1903793 | positive regulation of anion transport                          | 3 |
| Biological_process | GO:0030879 | mammary gland development                                       | 5 |
| Biological_process | GO:0051897 | positive regulation of protein kinase B signaling               | 4 |
| Biological_process | GO:0051952 | regulation of amine transport                                   | 4 |
| Biological_process | GO:0042756 | drinking behavior                                               | 2 |
| Biological_process | GO:0045820 | negative regulation of glycolytic process                       | 2 |
| Biological_process | GO:0050930 | induction of positive chemotaxis                                | 2 |
| Biological_process | GO:0001959 | regulation of cytokine-mediated signaling pathway               | 4 |
| Biological_process | GO:1902903 | regulation of supramolecular fiber organization                 | 7 |
| Biological_process | GO:0010171 | body morphogenesis                                              | 3 |
| Biological_process | GO:0015718 | monocarboxylic acid transport                                   | 4 |
| Biological_process | GO:0031113 | regulation of microtubule polymerization                        | 3 |
| Biological_process | GO:0048736 | appendage development                                           | 5 |
| Biological_process | GO:0060173 | limb development                                                | 5 |
| Biological_process | GO:0050922 | negative regulation of chemotaxis                               | 3 |

|                    |            |                                                          |    |
|--------------------|------------|----------------------------------------------------------|----|
| Biological_process | GO:0031109 | microtubule polymerization or depolymerization           | 4  |
| Biological_process | GO:0071774 | response to fibroblast growth factor                     | 4  |
| Biological_process | GO:0021872 | forebrain generation of neurons                          | 3  |
| Biological_process | GO:0046850 | regulation of bone remodeling                            | 3  |
| Biological_process | GO:0055078 | sodium ion homeostasis                                   | 3  |
| Biological_process | GO:1990138 | neuron projection extension                              | 5  |
| Biological_process | GO:0045765 | regulation of angiogenesis                               | 6  |
| Biological_process | GO:0032306 | regulation of prostaglandin secretion                    | 2  |
| Biological_process | GO:0033605 | positive regulation of catecholamine secretion           | 2  |
| Biological_process | GO:0042026 | protein refolding                                        | 2  |
| Biological_process | GO:0043252 | sodium-independent organic anion transport               | 2  |
| Biological_process | GO:0071389 | cellular response to mineralocorticoid stimulus          | 2  |
| Biological_process | GO:0090083 | regulation of inclusion body assembly                    | 2  |
| Biological_process | GO:1901673 | regulation of mitotic spindle assembly                   | 2  |
| Biological_process | GO:0007162 | negative regulation of cell adhesion                     | 6  |
| Biological_process | GO:1902905 | positive regulation of supramolecular fiber organization | 5  |
| Biological_process | GO:0046717 | acid secretion                                           | 3  |
| Cellular_component | GO:0005583 | fibrillar collagen trimer                                | 5  |
| Cellular_component | GO:0098643 | banded collagen fibril                                   | 5  |
| Cellular_component | GO:0098644 | complex of collagen trimers                              | 5  |
| Cellular_component | GO:0062023 | collagen-containing extracellular matrix                 | 9  |
| Cellular_component | GO:0031012 | extracellular matrix                                     | 11 |
| Cellular_component | GO:0030312 | external encapsulating structure                         | 11 |
| Cellular_component | GO:0005581 | collagen trimer                                          | 5  |
| Cellular_component | GO:0030141 | secretory granule                                        | 10 |
| Cellular_component | GO:0045121 | membrane raft                                            | 10 |
| Cellular_component | GO:0098857 | membrane microdomain                                     | 10 |
| Cellular_component | GO:0045334 | clathrin-coated endocytic vesicle                        | 3  |
| Cellular_component | GO:0030136 | clathrin-coated vesicle                                  | 5  |



|                    |            |                                                                                                  |    |
|--------------------|------------|--------------------------------------------------------------------------------------------------|----|
| Cellular_component | GO:0043235 | receptor complex                                                                                 | 8  |
| Cellular_component | GO:0045178 | basal part of cell                                                                               | 7  |
| Cellular_component | GO:0098802 | plasma membrane signaling receptor complex                                                       | 5  |
| Cellular_component | GO:0009898 | cytoplasmic side of plasma membrane                                                              | 5  |
| Cellular_component | GO:0005892 | acetylcholine-gated channel complex                                                              | 2  |
| Cellular_component | GO:0098981 | cholinergic synapse                                                                              | 2  |
| Cellular_component | GO:0030135 | coated vesicle                                                                                   | 5  |
| Cellular_component | GO:0098562 | cytoplasmic side of membrane                                                                     | 5  |
| Cellular_component | GO:0009897 | external side of plasma membrane                                                                 | 7  |
| Molecular_function | GO:0048407 | platelet-derived growth factor binding                                                           | 4  |
| Molecular_function | GO:0019838 | growth factor binding                                                                            | 8  |
| Molecular_function | GO:0005201 | extracellular matrix structural constituent                                                      | 5  |
| Molecular_function | GO:0048018 | receptor ligand activity                                                                         | 10 |
| Molecular_function | GO:0030546 | signaling receptor activator activity                                                            | 10 |
| Molecular_function | GO:0002020 | protease binding                                                                                 | 6  |
| Molecular_function | GO:0001664 | G protein-coupled receptor binding                                                               | 8  |
| Molecular_function | GO:0030545 | signaling receptor regulator activity                                                            | 10 |
| Molecular_function | GO:0005125 | cytokine activity                                                                                | 6  |
| Molecular_function | GO:0015101 | organic cation transmembrane transporter activity                                                | 3  |
| Molecular_function | GO:0008509 | anion transmembrane transporter activity                                                         | 7  |
| Molecular_function | GO:1901474 | azole transmembrane transporter activity                                                         | 2  |
| Molecular_function | GO:0005452 | inorganic anion exchanger activity                                                               | 2  |
| Molecular_function | GO:0042166 | acetylcholine binding                                                                            | 2  |
| Molecular_function | GO:0008514 | organic anion transmembrane transporter activity                                                 | 5  |
| Molecular_function | GO:0005161 | platelet-derived growth factor receptor binding                                                  | 2  |
| Molecular_function | GO:1904315 | transmitter-gated ion channel activity involved in regulation of postsynaptic membrane potential | 3  |
| Molecular_function | GO:0031005 | filamin binding                                                                                  | 2  |

|                    |            |                                                                                              |   |
|--------------------|------------|----------------------------------------------------------------------------------------------|---|
| Molecular_function | GO:0099529 | neurotransmitter receptor activity involved in regulation of postsynaptic membrane potential | 3 |
| Molecular_function | GO:0050839 | cell adhesion molecule binding                                                               | 6 |
| Molecular_function | GO:0022848 | acetylcholine-gated cation-selective channel activity                                        | 2 |
| Molecular_function | GO:0022824 | transmitter-gated ion channel activity                                                       | 3 |
| Molecular_function | GO:0022835 | transmitter-gated channel activity                                                           | 3 |
| Molecular_function | GO:0015347 | sodium-independent organic anion transmembrane transporter activity                          | 2 |
| Molecular_function | GO:0015464 | acetylcholine receptor activity                                                              | 2 |
| Molecular_function | GO:0005179 | hormone activity                                                                             | 4 |
| Molecular_function | GO:0005230 | extracellular ligand-gated ion channel activity                                              | 3 |
| Molecular_function | GO:0098960 | postsynaptic neurotransmitter receptor activity                                              | 3 |
| Molecular_function | GO:0015103 | inorganic anion transmembrane transporter activity                                           | 4 |

---
