# Supplementary material for: Transcriptomic analysis of the cerebral hippocampal tissue in spontaneously hypertensive rats exposed to acute hypobaric hypoxia: associations with inflammation and energy metabolism
Source: PubMed Central journal article supplement (PMC9988845; doi:10.1038/s41598-023-30682-0), 2023-03-06
Supplement: 41598_2023_30682_MOESM6_ESM.pdf [file 41598_2023_30682_MOESM6_ESM.pdf]

**Table S4. The table of up-regulated differentially expressed genes (DEGs) using Gene Ontology (GO) terms annotation cluster.**

| <b>Term Type</b>   | <b>Term description</b>                                  | <b>Number of up-regulated DEGs</b> |
|--------------------|----------------------------------------------------------|------------------------------------|
| Biological_process | regulation of cell-cell adhesion                         | 6                                  |
| Biological_process | positive regulation of cell adhesion                     | 5                                  |
| Biological_process | positive regulation of cell-cell adhesion                | 4                                  |
| Biological_process | regulation of alpha-beta T cell activation               | 3                                  |
| Biological_process | regulation of leukocyte cell-cell adhesion               | 4                                  |
| Biological_process | regulation of T cell activation                          | 4                                  |
| Biological_process | erythrocyte differentiation                              | 3                                  |
| Biological_process | leukocyte cell-cell adhesion                             | 4                                  |
| Biological_process | regulation of positive chemotaxis                        | 2                                  |
| Biological_process | erythrocyte homeostasis                                  | 3                                  |
| Biological_process | alpha-beta T cell activation                             | 3                                  |
| Biological_process | regulation of endothelial cell migration                 | 3                                  |
| Biological_process | regulation of T cell proliferation                       | 3                                  |
| Biological_process | regulation of alpha-beta T cell proliferation            | 2                                  |
| Biological_process | erythrocyte development                                  | 2                                  |
| Biological_process | positive regulation of morphogenesis of an epithelium    | 2                                  |
| Biological_process | alpha-beta T cell proliferation                          | 2                                  |
| Biological_process | myeloid cell homeostasis                                 | 3                                  |
| Biological_process | response to hydrogen peroxide                            | 3                                  |
| Biological_process | regulation of lymphocyte activation                      | 4                                  |
| Biological_process | positive regulation of T cell activation                 | 3                                  |
| Biological_process | positive regulation of alpha-beta T cell differentiation | 2                                  |
| Biological_process | T cell proliferation                                     | 3                                  |
| Biological_process | endothelial cell migration                               | 3                                  |

|                    |                                                     |   |
|--------------------|-----------------------------------------------------|---|
| Biological_process | positive regulation of leukocyte cell-cell adhesion | 3 |
| Biological_process | extrinsic apoptotic signaling pathway               | 3 |
| Biological_process | regulation of cell-substrate adhesion               | 3 |
| Biological_process | regulation of lymphocyte proliferation              | 3 |
| Biological_process | regulation of epithelial cell migration             | 3 |
| Biological_process | regulation of mononuclear cell proliferation        | 3 |
| Cellular_component | cytoplasmic side of plasma membrane                 | 3 |
| Cellular_component | cytoplasmic side of membrane                        | 3 |

---
