# Supplementary material for: Transcriptomic analysis of the cerebral hippocampal tissue in spontaneously hypertensive rats exposed to acute hypobaric hypoxia: associations with inflammation and energy metabolism
Source: PubMed Central journal article supplement (PMC9988845; doi:10.1038/s41598-023-30682-0), 2023-03-06
Supplement: 41598_2023_30682_MOESM7_ESM.pdf [file 41598_2023_30682_MOESM7_ESM.pdf]

**Table S5. The table of down-regulated differentially expressed genes (DEGs) using Gene Ontology (GO) terms annotation cluster.**

| <b>Term Type</b>   | <b>Term description</b>                                                              | <b>Number of down-regulated DEGs</b> |
|--------------------|--------------------------------------------------------------------------------------|--------------------------------------|
| Biological_process | collagen fibril organization                                                         | 5                                    |
| Biological_process | axon guidance                                                                        | 8                                    |
| Biological_process | neuron projection guidance                                                           | 8                                    |
| Biological_process | response to corticosteroid                                                           | 9                                    |
| Biological_process | ossification                                                                         | 10                                   |
| Biological_process | synaptic transmission, cholinergic                                                   | 4                                    |
| Biological_process | response to mechanical stimulus                                                      | 9                                    |
| Biological_process | response to transforming growth factor beta                                          | 8                                    |
| Biological_process | branching involved in blood vessel morphogenesis                                     | 4                                    |
| Biological_process | response to glucocorticoid                                                           | 8                                    |
| Biological_process | nucleotide-binding oligomerization domain containing 2 signaling pathway             | 3                                    |
| Biological_process | positive regulation of cytokine-mediated signaling pathway                           | 4                                    |
| Biological_process | response to temperature stimulus                                                     | 7                                    |
| Biological_process | vascular process in circulatory system                                               | 7                                    |
| Biological_process | nucleotide-binding oligomerization domain containing signaling pathway               | 3                                    |
| Biological_process | biomineral tissue development                                                        | 6                                    |
| Biological_process | biomineralization                                                                    | 6                                    |
| Biological_process | cellular response to tumor necrosis factor                                           | 7                                    |
| Biological_process | nucleotide-binding domain, leucine rich repeat containing receptor signaling pathway | 3                                    |
| Biological_process | positive regulation of response to cytokine stimulus                                 | 4                                    |

|                    |                                                               |   |
|--------------------|---------------------------------------------------------------|---|
| Biological_process | cellular response to transforming growth factor beta stimulus | 7 |
| Biological_process | neural crest cell migration                                   | 4 |
| Biological_process | excretion                                                     | 4 |
| Biological_process | regulation of anion transport                                 | 5 |
| Biological_process | cellular response to glucocorticoid stimulus                  | 5 |
| Biological_process | response to tumor necrosis factor                             | 7 |
| Biological_process | axonogenesis                                                  | 9 |
| Biological_process | smooth muscle contraction                                     | 5 |
| Biological_process | amine transport                                               | 5 |
| Biological_process | mesenchyme development                                        | 7 |
| Biological_process | cellular response to corticosteroid stimulus                  | 5 |
| Biological_process | canonical Wnt signaling pathway                               | 7 |
| Biological_process | regulation of smooth muscle contraction                       | 4 |
| Biological_process | trabecula formation                                           | 3 |
| Biological_process | carboxylic acid transport                                     | 7 |
| Biological_process | vascular associated smooth muscle contraction                 | 3 |
| Biological_process | regulation of blood pressure                                  | 6 |
| Biological_process | response to nicotine                                          | 4 |
| Biological_process | cellular extravasation                                        | 4 |
| Biological_process | innervation                                                   | 3 |
| Biological_process | Wnt signaling pathway                                         | 8 |
| Biological_process | cell-cell signaling by wnt                                    | 8 |
| Biological_process | regulation of axon extension involved in axon guidance        | 3 |
| Biological_process | mesenchymal cell differentiation                              | 6 |
| Biological_process | tumor necrosis factor-mediated signaling pathway              | 4 |

|                    |                                                                                                              |   |
|--------------------|--------------------------------------------------------------------------------------------------------------|---|
| Biological_process | odontogenesis                                                                                                | 5 |
| Biological_process | positive regulation of smooth muscle contraction                                                             | 3 |
| Biological_process | regulation of cell growth                                                                                    | 8 |
| Biological_process | organic acid transport                                                                                       | 7 |
| Biological_process | negative regulation of signal transduction in absence of ligand                                              | 3 |
| Biological_process | negative regulation of extrinsic apoptotic signaling pathway in absence of ligand                            | 3 |
| Biological_process | neural crest cell development                                                                                | 4 |
| Biological_process | axon extension involved in axon guidance                                                                     | 3 |
| Biological_process | neuron projection extension involved in neuron projection guidance                                           | 3 |
| Biological_process | mesenchymal cell development                                                                                 | 4 |
| Biological_process | stem cell development                                                                                        | 4 |
| Biological_process | organic cation transport                                                                                     | 3 |
| Biological_process | nerve development                                                                                            | 4 |
| Biological_process | neural crest cell differentiation                                                                            | 4 |
| Biological_process | regulation of microtubule polymerization or depolymerization                                                 | 4 |
| Biological_process | regulation of cellular extravasation                                                                         | 3 |
| Biological_process | appendage morphogenesis                                                                                      | 5 |
| Biological_process | limb morphogenesis                                                                                           | 5 |
| Biological_process | neurotransmitter loading into synaptic vesicle                                                               | 2 |
| Biological_process | negative regulation of mitochondrial outer membrane permeabilization involved in apoptotic signaling pathway | 2 |
| Biological_process | head morphogenesis                                                                                           | 3 |
| Biological_process | organic anion transport                                                                                      | 7 |
| Biological_process | extracellular matrix assembly                                                                                | 3 |

|                    |                                                                                      |   |
|--------------------|--------------------------------------------------------------------------------------|---|
| Biological_process | regulation of blood circulation                                                      | 6 |
| Biological_process | regulation of microtubule nucleation                                                 | 2 |
| Biological_process | limb bud formation                                                                   | 2 |
| Biological_process | regulation of nucleotide-binding oligomerization domain containing signaling pathway | 2 |
| Biological_process | negative regulation of inclusion body assembly                                       | 2 |
| Biological_process | transforming growth factor beta receptor signaling pathway                           | 5 |
| Biological_process | regulation of tube diameter                                                          | 5 |
| Biological_process | blood vessel diameter maintenance                                                    | 5 |
| Biological_process | regulation of tube size                                                              | 5 |
| Biological_process | branching morphogenesis of an epithelial tube                                        | 5 |
| Biological_process | azole transmembrane transport                                                        | 2 |
| Biological_process | regulation of uterine smooth muscle contraction                                      | 2 |
| Biological_process | positive regulation of tumor necrosis factor-mediated signaling pathway              | 2 |
| Biological_process | regulation of heart rate                                                             | 4 |
| Biological_process | positive regulation of epithelial to mesenchymal transition                          | 3 |
| Biological_process | regulation of extrinsic apoptotic signaling pathway in absence of ligand             | 3 |
| Biological_process | cytoplasmic pattern recognition receptor signaling pathway                           | 3 |
| Biological_process | positive regulation of muscle contraction                                            | 3 |
| Biological_process | regulation of apoptotic signaling pathway                                            | 7 |
| Biological_process | vasoconstriction                                                                     | 4 |
| Biological_process | positive regulation of neuron differentiation                                        | 4 |
| Biological_process | transforming growth factor beta1 production                                          | 2 |
| Biological_process | skin morphogenesis                                                                   | 2 |

|                    |                                                                                            |   |
|--------------------|--------------------------------------------------------------------------------------------|---|
| Biological_process | elastic fiber assembly                                                                     | 2 |
| Biological_process | male mating behavior                                                                       | 2 |
| Biological_process | bone trabecula formation                                                                   | 2 |
| Biological_process | uterine smooth muscle contraction                                                          | 2 |
| Biological_process | cytokine-mediated signaling pathway                                                        | 7 |
| Biological_process | positive regulation of amine transport                                                     | 3 |
| Biological_process | connective tissue development                                                              | 6 |
| Biological_process | appendage development                                                                      | 5 |
| Biological_process | limb development                                                                           | 5 |
| Biological_process | positive regulation of organic acid transport                                              | 3 |
| Biological_process | extracellular matrix organization                                                          | 6 |
| Biological_process | regulation of amine transport                                                              | 4 |
| Biological_process | extracellular structure organization                                                       | 6 |
| Biological_process | trabecula morphogenesis                                                                    | 3 |
| Biological_process | mesenchyme morphogenesis                                                                   | 3 |
| Biological_process | external encapsulating structure organization                                              | 6 |
| Biological_process | regulation of cytokine-mediated signaling pathway                                          | 4 |
| Biological_process | monocarboxylic acid transport                                                              | 4 |
| Biological_process | positive regulation of renal sodium excretion                                              | 2 |
| Biological_process | regulation of ribonuclease activity                                                        | 2 |
| Biological_process | negative regulation of transcription from RNA polymerase II promoter in response to stress | 2 |
| Biological_process | bone mineralization                                                                        | 4 |
| Biological_process | positive regulation of anion transport                                                     | 3 |
| Biological_process | microtubule polymerization or depolymerization                                             | 4 |
| Biological_process | renal system process                                                                       | 4 |

|                    |                                                 |   |
|--------------------|-------------------------------------------------|---|
| Biological_process | body morphogenesis                              | 3 |
| Biological_process | cartilage development                           | 5 |
| Biological_process | positive regulation of prostaglandin secretion  | 2 |
| Biological_process | regulation of microtubule polymerization        | 3 |
| Biological_process | osteoblast differentiation                      | 5 |
| Biological_process | regulation of response to cytokine stimulus     | 4 |
| Biological_process | forebrain generation of neurons                 | 3 |
| Biological_process | sodium ion homeostasis                          | 3 |
| Biological_process | drinking behavior                               | 2 |
| Biological_process | bone trabecula morphogenesis                    | 2 |
| Biological_process | regulation of ossification                      | 4 |
| Biological_process | morphogenesis of a branching epithelium         | 5 |
| Biological_process | positive regulation of ion transport            | 6 |
| Biological_process | acid secretion                                  | 3 |
| Biological_process | ear morphogenesis                               | 4 |
| Biological_process | regulation of neuron differentiation            | 5 |
| Biological_process | response to heat                                | 4 |
| Biological_process | regulation of prostaglandin secretion           | 2 |
| Biological_process | positive regulation of catecholamine secretion  | 2 |
| Biological_process | protein refolding                               | 2 |
| Biological_process | sodium-independent organic anion transport      | 2 |
| Biological_process | cellular response to mineralocorticoid stimulus | 2 |
| Biological_process | regulation of inclusion body assembly           | 2 |
| Biological_process | regulation of mitotic spindle assembly          | 2 |
| Biological_process | visual perception                               | 4 |
| Biological_process | endochondral bone morphogenesis                 | 3 |

|                    |                                                                                                     |   |
|--------------------|-----------------------------------------------------------------------------------------------------|---|
| Biological_process | reactive oxygen species metabolic process                                                           | 5 |
| Biological_process | stem cell differentiation                                                                           | 5 |
| Biological_process | regulation of catecholamine secretion                                                               | 3 |
| Biological_process | nephron tubule formation                                                                            | 2 |
| Biological_process | axon extension                                                                                      | 4 |
| Biological_process | sensory perception of light stimulus                                                                | 4 |
| Biological_process | morphogenesis of a branching structure                                                              | 5 |
| Biological_process | pattern specification process                                                                       | 7 |
| Biological_process | catecholamine secretion                                                                             | 3 |
| Biological_process | epithelial to mesenchymal transition                                                                | 4 |
| Biological_process | response to retinoic acid                                                                           | 4 |
| Biological_process | positive regulation of icosanoid secretion                                                          | 2 |
| Biological_process | chaperone-mediated protein complex assembly                                                         | 2 |
| Biological_process | negative regulation of digestive system process                                                     | 2 |
| Biological_process | response to mineralocorticoid                                                                       | 3 |
| Biological_process | amide transport                                                                                     | 6 |
| Biological_process | prostaglandin secretion                                                                             | 2 |
| Biological_process | regulation of mitochondrial outer membrane permeabilization involved in apoptotic signaling pathway | 2 |
| Biological_process | negative regulation of endoplasmic reticulum stress-induced intrinsic apoptotic signaling pathway   | 2 |
| Biological_process | positive regulation of leukocyte migration                                                          | 4 |
| Biological_process | positive regulation of secretion by cell                                                            | 6 |
| Biological_process | sensory perception of pain                                                                          | 4 |
| Biological_process | negative regulation of transforming growth factor beta receptor signaling pathway                   | 3 |

|                    |                                                                          |   |
|--------------------|--------------------------------------------------------------------------|---|
| Biological_process | signal transduction in absence of ligand                                 | 3 |
| Biological_process | cellular response to retinoic acid                                       | 3 |
| Biological_process | extrinsic apoptotic signaling pathway in absence of ligand               | 3 |
| Biological_process | positive regulation of cellular extravasation                            | 2 |
| Biological_process | cell migration in hindbrain                                              | 2 |
| Biological_process | regulation of odontogenesis                                              | 2 |
| Biological_process | cellular response to steroid hormone stimulus                            | 5 |
| Biological_process | monovalent inorganic cation homeostasis                                  | 4 |
| Biological_process | regulation of microtubule cytoskeleton organization                      | 4 |
| Biological_process | regulation of postsynaptic membrane potential                            | 4 |
| Biological_process | regionalization                                                          | 6 |
| Biological_process | parturition                                                              | 2 |
| Biological_process | transmembrane receptor protein serine/threonine kinase signaling pathway | 6 |
| Biological_process | leukocyte migration                                                      | 6 |
| Cellular_component | fibrillar collagen trimer                                                | 5 |
| Cellular_component | banded collagen fibril                                                   | 5 |
| Cellular_component | complex of collagen trimers                                              | 5 |
| Cellular_component | collagen trimer                                                          | 5 |
| Cellular_component | extracellular matrix                                                     | 9 |
| Cellular_component | external encapsulating structure                                         | 9 |
| Cellular_component | collagen-containing extracellular matrix                                 | 7 |
| Cellular_component | clathrin-coated endocytic vesicle                                        | 3 |
| Cellular_component | secretory granule                                                        | 8 |
| Cellular_component | membrane raft                                                            | 8 |



|                    |                                                                                                  |   |
|--------------------|--------------------------------------------------------------------------------------------------|---|
| Cellular_component | membrane microdomain                                                                             | 8 |
| Cellular_component | clathrin-coated vesicle                                                                          | 4 |
| Cellular_component | basal part of cell                                                                               | 6 |
| Cellular_component | acetylcholine-gated channel complex                                                              | 2 |
| Cellular_component | cholinergic synapse                                                                              | 2 |
| Cellular_component | synaptic vesicle                                                                                 | 5 |
| Cellular_component | plasma membrane signaling receptor complex                                                       | 4 |
| Cellular_component | receptor complex                                                                                 | 6 |
| Molecular_function | platelet-derived growth factor binding                                                           | 4 |
| Molecular_function | extracellular matrix structural constituent                                                      | 5 |
| Molecular_function | growth factor binding                                                                            | 6 |
| Molecular_function | G protein-coupled receptor binding                                                               | 8 |
| Molecular_function | receptor ligand activity                                                                         | 9 |
| Molecular_function | signaling receptor activator activity                                                            | 9 |
| Molecular_function | signaling receptor regulator activity                                                            | 9 |
| Molecular_function | organic cation transmembrane transporter activity                                                | 3 |
| Molecular_function | protease binding                                                                                 | 5 |
| Molecular_function | azole transmembrane transporter activity                                                         | 2 |
| Molecular_function | cell adhesion molecule binding                                                                   | 6 |
| Molecular_function | cytokine activity                                                                                | 5 |
| Molecular_function | acetylcholine binding                                                                            | 2 |
| Molecular_function | anion transmembrane transporter activity                                                         | 6 |
| Molecular_function | transmitter-gated ion channel activity involved in regulation of postsynaptic membrane potential | 3 |
| Molecular_function | neurotransmitter receptor activity involved in regulation of postsynaptic membrane potential     | 3 |
| Molecular_function | transmitter-gated ion channel activity                                                           | 3 |

|                    |                                                                     |   |
|--------------------|---------------------------------------------------------------------|---|
| Molecular_function | transmitter-gated channel activity                                  | 3 |
| Molecular_function | hormone activity                                                    | 4 |
| Molecular_function | DNA-binding transcription factor binding                            | 7 |
| Molecular_function | acetylcholine-gated cation-selective channel activity               | 2 |
| Molecular_function | RNA polymerase II-specific DNA-binding transcription factor binding | 6 |
| Molecular_function | sodium-independent organic anion transmembrane transporter activity | 2 |
| Molecular_function | acetylcholine receptor activity                                     | 2 |
| Molecular_function | extracellular ligand-gated ion channel activity                     | 3 |
| Molecular_function | postsynaptic neurotransmitter receptor activity                     | 3 |
| Molecular_function | neurotransmitter binding                                            | 2 |
| Molecular_function | vitamin transmembrane transporter activity                          | 2 |
| Molecular_function | misfolded protein binding                                           | 2 |
| Molecular_function | organic anion transmembrane transporter activity                    | 4 |

---
