# Supplementary material for: Transcriptomic analysis of the cerebral hippocampal tissue in spontaneously hypertensive rats exposed to acute hypobaric hypoxia: associations with inflammation and energy metabolism
Source: PubMed Central journal article supplement (PMC9988845; doi:10.1038/s41598-023-30682-0), 2023-03-06
Supplement: 41598_2023_30682_MOESM8_ESM.pdf [file 41598_2023_30682_MOESM8_ESM.pdf]

**Table S6. Summary of Clusters of orthologous groups of proteins (COG) classification analysis of 112 differential expression genes (DEGs).**

| Type                               | Functional Categories                                            | Frequency |
|------------------------------------|------------------------------------------------------------------|-----------|
| METABOLISM                         | [C]Energy production and conversion                              | 6         |
| METABOLISM                         | [E]Amino acid transport and metabolism                           | 7         |
| METABOLISM                         | [F]Nucleotide transport and metabolism                           | 3         |
| METABOLISM                         | [G]Carbohydrate transport and metabolism                         | 16        |
| METABOLISM                         | [H]Coenzyme transport and metabolism                             | 2         |
| METABOLISM                         | [I]Lipid transport and metabolism                                | 4         |
| INFORMATION STORAGE AND PROCESSING | [J]Translation, ribosomal structure and biogenesis               | 32        |
| INFORMATION STORAGE AND PROCESSING | [K]Transcription                                                 | 5         |
| INFORMATION STORAGE AND PROCESSING | [L]Replication, recombination and repair                         | 22        |
| CELLULAR PROCESSES AND SIGNALING   | [M]Cell wall/membrane/envelope biogenesis                        | 10        |
| CELLULAR PROCESSES AND SIGNALING   | [O]Posttranslational modification, protein turnover, chaperones  | 14        |
| METABOLISM                         | [P]Inorganic ion transport and metabolism                        | 3         |
| METABOLISM                         | [Q]Secondary metabolites biosynthesis, transport and catabolism  | 1         |
| POORLY CHARACTERIZED               | [R]General function prediction only                              | 94        |
| POORLY CHARACTERIZED               | [S]Function unknown                                              | 8         |
| CELLULAR PROCESSES AND SIGNALING   | [T]Signal transduction mechanisms                                | 8         |
| CELLULAR PROCESSES AND SIGNALING   | [U]Intracellular trafficking, secretion, and vesicular transport | 4         |
| CELLULAR PROCESSES AND SIGNALING   | [V]Defense mechanisms                                            | 5         |
