# Supplementary material for: Transcriptomic analysis of the cerebral hippocampal tissue in spontaneously hypertensive rats exposed to acute hypobaric hypoxia: associations with inflammation and energy metabolism
Source: PubMed Central journal article supplement (PMC9988845; doi:10.1038/s41598-023-30682-0), 2023-03-06
Supplement: 41598_2023_30682_MOESM9_ESM.pdf [file 41598_2023_30682_MOESM9_ESM.pdf]

**Table S7. Summary of Kyoto Encyclopedia of Genes and Genomes (KEGG)****pathways analysis of 112 differential expression genes (DEGs).**

| <b>Pathway ID</b> | <b>Description</b>                                            | <b>Number of DEGs in category</b> |
|-------------------|---------------------------------------------------------------|-----------------------------------|
| rno04926          | Relaxin signaling pathway                                     | 8                                 |
| rno04151          | PI3K-Akt signaling pathway                                    | 10                                |
| rno05146          | Amoebiasis                                                    | 5                                 |
| rno04933          | AGE-RAGE signaling pathway in diabetic complications          | 5                                 |
| rno04080          | Neuroactive ligand-receptor interaction                       | 9                                 |
| rno04510          | Focal adhesion                                                | 6                                 |
| rno05205          | Proteoglycans in cancer                                       | 6                                 |
| rno04512          | ECM-receptor interaction                                      | 4                                 |
| rno04014          | Ras signaling pathway                                         | 6                                 |
| rno04064          | NF-kappa B signaling pathway                                  | 4                                 |
| rno04916          | Melanogenesis                                                 | 4                                 |
| rno04974          | Protein digestion and absorption                              | 4                                 |
| rno04659          | Th17 cell differentiation                                     | 4                                 |
| rno05134          | Legionellosis                                                 | 3                                 |
| rno05165          | Human papillomavirus infection                                | 7                                 |
| rno05217          | Basal cell carcinoma                                          | 3                                 |
| rno04010          | MAPK signaling pathway                                        | 6                                 |
| rno05162          | Measles                                                       | 4                                 |
| rno05224          | Breast cancer                                                 | 4                                 |
| rno05226          | Gastric cancer                                                | 4                                 |
| rno04061          | Viral protein interaction with cytokine and cytokine receptor | 3                                 |
| rno04150          | mTOR signaling pathway                                        | 4                                 |
| rno04658          | Th1 and Th2 cell differentiation                              | 3                                 |
| rno04310          | Wnt signaling pathway                                         | 4                                 |
| rno05340          | Primary immunodeficiency                                      | 2                                 |
| rno04650          | Natural killer cell mediated cytotoxicity                     | 3                                 |
| rno05225          | Hepatocellular carcinoma                                      | 4                                 |
| rno04060          | Cytokine-cytokine receptor interaction                        | 5                                 |
| rno04216          | Ferroptosis                                                   | 2                                 |
| rno05145          | Toxoplasmosis                                                 | 3                                 |
| rno04725          | Cholinergic synapse                                           | 3                                 |
| rno04066          | HIF-1 signaling pathway                                       | 3                                 |
| rno04722          | Neurotrophin signaling pathway                                | 3                                 |
| rno04380          | Osteoclast differentiation                                    | 3                                 |
| rno05417          | Lipid and atherosclerosis                                     | 4                                 |
| rno05415          | Diabetic cardiomyopathy                                       | 4                                 |
| rno04611          | Platelet activation                                           | 3                                 |
| rno05167          | Kaposi sarcoma-associated herpesvirus infection               | 4                                 |

|          |                                                          |   |
|----------|----------------------------------------------------------|---|
| rno04915 | Estrogen signaling pathway                               | 3 |
| rno04550 | Signaling pathways regulating pluripotency of stem cells | 3 |
| rno04213 | Longevity regulating pathway - multiple species          | 2 |
| rno05163 | Human cytomegalovirus infection                          | 4 |
| rno05418 | Fluid shear stress and atherosclerosis                   | 3 |
| rno04520 | Adherens junction                                        | 2 |
| rno04390 | Hippo signaling pathway                                  | 3 |
| rno04934 | Cushing syndrome                                         | 3 |
| rno05412 | Arrhythmogenic right ventricular cardiomyopathy          | 2 |
| rno00533 | Glycosaminoglycan biosynthesis - keratan sulfate         | 1 |
| rno05220 | Chronic myeloid leukemia                                 | 2 |
| rno01521 | EGFR tyrosine kinase inhibitor resistance                | 2 |
| rno05323 | Rheumatoid arthritis                                     | 2 |
| rno04612 | Antigen processing and presentation                      | 2 |
| rno04062 | Chemokine signaling pathway                              | 3 |
| rno05235 | PD-L1 expression and PD-1 checkpoint pathway in cancer   | 2 |
| rno05206 | MicroRNAs in cancer                                      | 4 |
| rno00360 | Phenylalanine metabolism                                 | 1 |
| rno04640 | Hematopoietic cell lineage                               | 2 |
| rno04727 | GABAergic synapse                                        | 2 |
| rno05410 | Hypertrophic cardiomyopathy                              | 2 |
| rno04657 | IL-17 signaling pathway                                  | 2 |
| rno04976 | Bile secretion                                           | 2 |
| rno05215 | Prostate cancer                                          | 2 |
| rno04660 | T cell receptor signaling pathway                        | 2 |
| rno04015 | Rap1 signaling pathway                                   | 3 |
| rno04977 | Vitamin digestion and absorption                         | 1 |
| rno04024 | cAMP signaling pathway                                   | 3 |
| rno04668 | TNF signaling pathway                                    | 2 |
| rno04966 | Collecting duct acid secretion                           | 1 |
| rno01523 | Antifolate resistance                                    | 1 |
| rno04726 | Serotonergic synapse                                     | 2 |
| rno04215 | Apoptosis - multiple species                             | 1 |
| rno05166 | Human T-cell leukemia virus 1 infection                  | 3 |
| rno03040 | Spliceosome                                              | 2 |
| rno04068 | FoxO signaling pathway                                   | 2 |
| rno04936 | Alcoholic liver disease                                  | 2 |
| rno05135 | Yersinia infection                                       | 2 |
| rno04210 | Apoptosis                                                | 2 |
| rno05132 | Salmonella infection                                     | 3 |
| rno00350 | Tyrosine metabolism                                      | 1 |
| rno04960 | Aldosterone-regulated sodium reabsorption                | 1 |
| rno05216 | Thyroid cancer                                           | 1 |
| rno04270 | Vascular smooth muscle contraction                       | 2 |

|          |                                                   |   |
|----------|---------------------------------------------------|---|
| rno00591 | Linoleic acid metabolism                          | 1 |
| rno05033 | Nicotine addiction                                | 1 |
| rno05143 | African trypanosomiasis                           | 1 |
| rno05219 | Bladder cancer                                    | 1 |
| rno04672 | Intestinal immune network for IgA production      | 1 |
| rno04144 | Endocytosis                                       | 3 |
| rno05030 | Cocaine addiction                                 | 1 |
| rno00380 | Tryptophan metabolism                             | 1 |
| rno04217 | Necroptosis                                       | 2 |
| rno04141 | Protein processing in endoplasmic reticulum       | 2 |
| rno05164 | Influenza A                                       | 2 |
| rno00600 | Sphingolipid metabolism                           | 1 |
| rno02010 | ABC transporters                                  | 1 |
| rno04623 | Cytosolic DNA-sensing pathway                     | 1 |
| rno05144 | Malaria                                           | 1 |
| rno05034 | Alcoholism                                        | 2 |
| rno04978 | Mineral absorption                                | 1 |
| rno04370 | VEGF signaling pathway                            | 1 |
| rno05213 | Endometrial cancer                                | 1 |
| rno04360 | Axon guidance                                     | 2 |
| rno04622 | RIG-I-like receptor signaling pathway             | 1 |
| rno05321 | Inflammatory bowel disease                        | 1 |
| rno05031 | Amphetamine addiction                             | 1 |
| rno05221 | Acute myeloid leukemia                            | 1 |
| rno05211 | Renal cell carcinoma                              | 1 |
| rno05140 | Leishmaniasis                                     | 1 |
| rno04920 | Adipocytokine signaling pathway                   | 1 |
| rno04924 | Renin secretion                                   | 1 |
| rno05214 | Glioma                                            | 1 |
| rno04917 | Prolactin signaling pathway                       | 1 |
| rno05212 | Pancreatic cancer                                 | 1 |
| rno04662 | B cell receptor signaling pathway                 | 1 |
| rno05100 | Bacterial invasion of epithelial cells            | 1 |
| rno04721 | Synaptic vesicle cycle                            | 1 |
| rno00590 | Arachidonic acid metabolism                       | 1 |
| rno04810 | Regulation of actin cytoskeleton                  | 2 |
| rno04012 | ErbB signaling pathway                            | 1 |
| rno05207 | Chemical carcinogenesis - receptor activation     | 2 |
| rno05208 | Chemical carcinogenesis - reactive oxygen species | 2 |
| rno05210 | Colorectal cancer                                 | 1 |
| rno05032 | Morphine addiction                                | 1 |
| rno05222 | Small cell lung cancer                            | 1 |
| rno04620 | Toll-like receptor signaling pathway              | 1 |
| rno01522 | Endocrine resistance                              | 1 |

|          |                                |   |
|----------|--------------------------------|---|
| rno05414 | Dilated cardiomyopathy         | 1 |
| rno00564 | Glycerophospholipid metabolism | 1 |
| rno05231 | Choline metabolism in cancer   | 1 |
| rno05142 | Chagas disease                 | 1 |
| rno04931 | Insulin resistance             | 1 |

---
