# Supplementary material for: Transcriptomic analysis of the cerebral hippocampal tissue in spontaneously hypertensive rats exposed to acute hypobaric hypoxia: associations with inflammation and energy metabolism
Source: PubMed Central journal article supplement (PMC9988845; doi:10.1038/s41598-023-30682-0), 2023-03-06
Supplement: 41598_2023_30682_MOESM10_ESM.pdf [file 41598_2023_30682_MOESM10_ESM.pdf]

**Table S8. Summary of Kyoto Encyclopedia of Genes and Genomes (KEGG) pathways analysis of up-regulated differential expression genes (DEGs).**

| <b>Pathway ID</b> | <b>Description</b>                              | <b>Number of DEGs<br/>in category</b> |
|-------------------|-------------------------------------------------|---------------------------------------|
| rno04014          | Ras signaling pathway                           | 5                                     |
| rno05340          | Primary immunodeficiency                        | 2                                     |
| rno01521          | EGFR tyrosine kinase inhibitor resistance       | 2                                     |
| rno04658          | Th1 and Th2 cell differentiation                | 2                                     |
| rno04650          | Natural killer cell mediated cytotoxicity       | 2                                     |
| rno04151          | PI3K-Akt signaling pathway                      | 3                                     |
| rno04659          | Th17 cell differentiation                       | 2                                     |
| rno04066          | HIF-1 signaling pathway                         | 2                                     |
| rno04926          | Relaxin signaling pathway                       | 2                                     |
| rno04510          | Focal adhesion                                  | 2                                     |
| rno04015          | Rap1 signaling pathway                          | 2                                     |
| rno05167          | Kaposi sarcoma-associated herpesvirus infection | 2                                     |
| rno04966          | Collecting duct acid secretion                  | 1                                     |
| rno05206          | MicroRNAs in cancer                             | 2                                     |
| rno04010          | MAPK signaling pathway                          | 2                                     |
| rno00591          | Linoleic acid metabolism                        | 1                                     |
| rno05143          | African trypanosomiasis                         | 1                                     |
| rno05219          | Bladder cancer                                  | 1                                     |
| rno04216          | Ferroptosis                                     | 1                                     |
