# Supplementary material for: Transcriptomic analysis of the cerebral hippocampal tissue in spontaneously hypertensive rats exposed to acute hypobaric hypoxia: associations with inflammation and energy metabolism
Source: PubMed Central journal article supplement (PMC9988845; doi:10.1038/s41598-023-30682-0), 2023-03-06
Supplement: 41598_2023_30682_MOESM11_ESM.pdf [file 41598_2023_30682_MOESM11_ESM.pdf]

**Table S9. Summary of Kyoto Encyclopedia of Genes and Genomes (KEGG) pathways analysis of down-regulated differential expression genes (DEGs).**

| <b>Pathway ID</b> | <b>Description</b>                                       | <b>Number of DEGs in category</b> |
|-------------------|----------------------------------------------------------|-----------------------------------|
| rno04926          | Relaxin signaling pathway                                | 6                                 |
| rno04080          | Neuroactive ligand-receptor interaction                  | 9                                 |
| rno05146          | Amoebiasis                                               | 5                                 |
| rno04512          | ECM-receptor interaction                                 | 4                                 |
| rno04916          | Melanogenesis                                            | 4                                 |
| rno04151          | PI3K-Akt signaling pathway                               | 7                                 |
| rno04933          | AGE-RAGE signaling pathway in diabetic complications     | 4                                 |
| rno04974          | Protein digestion and absorption                         | 4                                 |
| rno05134          | Legionellosis                                            | 3                                 |
| rno05205          | Proteoglycans in cancer                                  | 5                                 |
| rno05217          | Basal cell carcinoma                                     | 3                                 |
| rno04150          | mTOR signaling pathway                                   | 4                                 |
| rno05165          | Human papillomavirus infection                           | 6                                 |
| rno04310          | Wnt signaling pathway                                    | 4                                 |
| rno04064          | NF-kappa B signaling pathway                             | 3                                 |
| rno04510          | Focal adhesion                                           | 4                                 |
| rno05145          | Toxoplasmosis                                            | 3                                 |
| rno04725          | Cholinergic synapse                                      | 3                                 |
| rno05417          | Lipid and atherosclerosis                                | 4                                 |
| rno05415          | Diabetic cardiomyopathy                                  | 4                                 |
| rno04380          | Osteoclast differentiation                               | 3                                 |
| rno04611          | Platelet activation                                      | 3                                 |
| rno04550          | Signaling pathways regulating pluripotency of stem cells | 3                                 |
| rno05162          | Measles                                                  | 3                                 |
| rno05224          | Breast cancer                                            | 3                                 |
| rno05226          | Gastric cancer                                           | 3                                 |
| rno04213          | Longevity regulating pathway - multiple species          | 2                                 |
| rno04390          | Hippo signaling pathway                                  | 3                                 |
| rno04934          | Cushing syndrome                                         | 3                                 |
| rno04060          | Cytokine-cytokine receptor interaction                   | 4                                 |
